# Supplementary material for: Co-occurrence of Risk Alleles in or Near Genes Modulating Insulin Secretion Predisposes Obese Youth to Prediabetes
Source: Oxford University Press journal article supplement (doi:10.2337/dc13-1458), 2013-09-24

SUPPLEMENTARY DATA

**Supplementary Table 1.** Main clinical characteristics of the pediatric cohort evaluating  $\beta$ -cell function assessed from OGTT by the Oral C-peptide Minimal Model

|                                               | <b>Total Cohort</b> | <b>NGT Obese Youth</b> | <b>IGT Obese Youth</b> |
|-----------------------------------------------|---------------------|------------------------|------------------------|
| <b>Number</b> †                               | 714                 | 530                    | 184                    |
| <b>Gender (M/F)</b>                           | 290/424             | 224/306                | 66/118                 |
| <b>Race (C/AA/H)</b>                          | 316/188/210         | 240/144/146            | 76/44/64               |
| <b>GT (NGT/IGT)</b>                           | 530/184             | 530/0                  | 0/184                  |
| <b>Age</b>                                    | 13.6±3.1            | 13.7±3.1               | 13.1±2.9               |
| <b>BMI (kg/m<sup>2</sup>)</b>                 | 33.4±7.4            | 33.2±7.3               | 34.2±7.4               |
| <b>BMI-Z</b>                                  | 2.2±0.4             | 2.2±0.4                | 2.2±0.4                |
| <b>Fasting Glucose (mg/dl)</b>                | 92±8                | 91±7                   | 97±10                  |
| <b>2-h Glucose (mg/dl)</b>                    | 122±25              | 111±16                 | 155±14                 |
| <b>Fasting Insulin (<math>\mu</math>U/ml)</b> | 33.9±21.3           | 31.7±20.4              | 40.3±22.5              |
| <b>Phi total *</b>                            | 84.8 (60.6-112.8)   | 89.3 (64.8-125.6)      | 72.5 (55.9-97.0)       |
| <b>SI *</b>                                   | 19.4 (10.6-32.6)    | 22.8 (14.1-36.6)       | 10.7 (6.1-20.1)        |
| <b>DI total *</b>                             | 2512 (1401-4274)    | 3121 (1909-5543)       | 1294 (727-2217)        |

Data are means±SD or \*median (interquartile range).

†Number of participants. M: Male; F: Female; C: Caucasians; AA: African Americans; H: Hispanics; NGT: Normal Glucose Tolerance; IGT: Impaired Glucose Tolerance; BMI: Body Mass Index; BMI-Z: Body Mass Index Zeta Score; SI: Insulin Sensitivity; DI: Disposition Index

SUPPLEMENTARY DATA

**Supplementary Table 2.** Minor allele frequencies (MAF) genotype distribution (101, 102 and 202) and Hardy Weinberg Equilibrium for each of the studied SNPs

| Caucasians           |           |      |            |            |            |             |
|----------------------|-----------|------|------------|------------|------------|-------------|
| Gene                 | rs        | MAF  | <b>101</b> | <b>102</b> | <b>202</b> | HWE p-value |
| <i>TCF7L2</i> (C/T)  | rs7903146 | 0.31 | 150        | 135        | 31         | 0.94        |
| <i>HHEX</i> (C/T)    | rs1111875 | 0.37 | 126        | 144        | 46         | 0.64        |
| <i>IGF2BP2</i> (G/T) | rs4402960 | 0.32 | 143        | 143        | 30         | 0.50        |
| <i>CDKALI</i> (G/C)  | rs7754840 | 0.41 | 113        | 147        | 56         | 0.49        |
| <i>HNF1A</i> (A/C)   | rs1169288 | 0.35 | 138        | 138        | 40         | 0.54        |
| African Americans    |           |      |            |            |            |             |
| <i>TCF7L2</i> (C/T)  | rs7903146 | 0.29 | 93         | 78         | 17         | 0.92        |
| <i>HHEX</i> (C/T)    | rs1111875 | 0.28 | 104        | 64         | 20         | 0.04        |
| <i>IGF2BP2</i> (G/T) | rs4402960 | 0.51 | 42         | 99         | 47         | 0.45        |
| <i>CDKALI</i> (G/C)  | rs7754840 | 0.52 | 45         | 91         | 52         | 0.67        |
| <i>HNF1A</i> (A/C)   | rs1169288 | 0.14 | 139        | 45         | 4          | 0.87        |
| Hispanics            |           |      |            |            |            |             |
| <i>TCF7L2</i> (C/T)  | rs7903146 | 0.27 | 113        | 79         | 18         | 0.43        |
| <i>HHEX</i> (C/T)    | rs1111875 | 0.33 | 89         | 102        | 19         | 0.18        |
| <i>IGF2BP2</i> (G/T) | rs4402960 | 0.32 | 98         | 91         | 21         | 0.98        |
| <i>CDKALI</i> (G/C)  | rs7754840 | 0.43 | 77         | 86         | 47         | 0.02        |
| <i>HNF1A</i> (A/C)   | rs1169288 | 0.37 | 80         | 104        | 26         | 0.37        |

**Supplementary Table 3.** Prevalence of Family History (FH) of type 2 diabetes according to the genetic risk score

|                 | Number of Risk Alleles |    |    |    |    |    |    |    |    |
|-----------------|------------------------|----|----|----|----|----|----|----|----|
|                 | 0                      | 1  | 2  | 3  | 4  | 5  | 6  | 7  | 8  |
| Negative FH (%) | 92                     | 83 | 76 | 77 | 72 | 71 | 41 | 67 | 50 |
| Positive FH (%) | 8                      | 17 | 24 | 23 | 28 | 29 | 59 | 33 | 50 |

SUPPLEMENTARY DATA

**Supplementary Table 4.** Linear regression analysis evaluating the association between 2h-glucose, Insulin Sensitivity (S<sub>I</sub>) or Disposition Index (DI) total and the gene risk score adjusted for Age, Gender, BMI-Z and Glucose Tolerance, divided by ethnicity

| Dependent Variables      | Independent variables | Ethnic Group |             |                   |             |           |             |
|--------------------------|-----------------------|--------------|-------------|-------------------|-------------|-----------|-------------|
|                          |                       | Caucasians   |             | African Americans |             | Hispanics |             |
|                          |                       | Beta         | P           | Beta              | P           | Beta      | P           |
| <b>Log 2h glucose</b>    | <b>Age</b>            | -.139        | .013        | -.068             | .346        | .022      | .755        |
|                          | <b>Gender</b>         | .094         | .088        | .080              | .258        | .090      | .195        |
|                          | <b>BMI-Z</b>          | .174         | .002        | .102              | .159        | .040      | .571        |
|                          | <b>Gene score</b>     | .221         | <b>.000</b> | .327              | <b>.000</b> | .307      | <b>.000</b> |
| <b>Log S<sub>I</sub></b> | <b>Age</b>            | -.116        | .022        | -.111             | .079        | -.236     | .001        |
|                          | <b>Gender</b>         | -.059        | .240        | -.159             | .011        | -.136     | .044        |
|                          | <b>BMI-Z</b>          | -.460        | .000        | -.374             | .000        | -.219     | .001        |
|                          | <b>GT</b>             | -.360        | .000        | -.469             | .000        | -.364     | .000        |
|                          | <b>Gene score</b>     | .041         | .423        | .101              | .113        | .024      | .722        |
| <b>Log DI Total</b>      | <b>Age</b>            | -.136        | .009        | -.106             | .088        | -.171     | .009        |
|                          | <b>Gender</b>         | -.049        | .333        | -.053             | .387        | -.134     | .037        |
|                          | <b>BMI-Z</b>          | -.378        | .000        | -.306             | .000        | -.186     | .005        |
|                          | <b>GT</b>             | -.415        | .000        | -.489             | .000        | -.387     | .000        |
|                          | <b>Gene score</b>     | -.120        | <b>.025</b> | -.157             | <b>.014</b> | -.254     | <b>.000</b> |

BMI-Z: Body Mass Index Zeta Score; GT: Glucose Tolerance.

SUPPLEMENTARY DATA

Supplementary Figure 1.

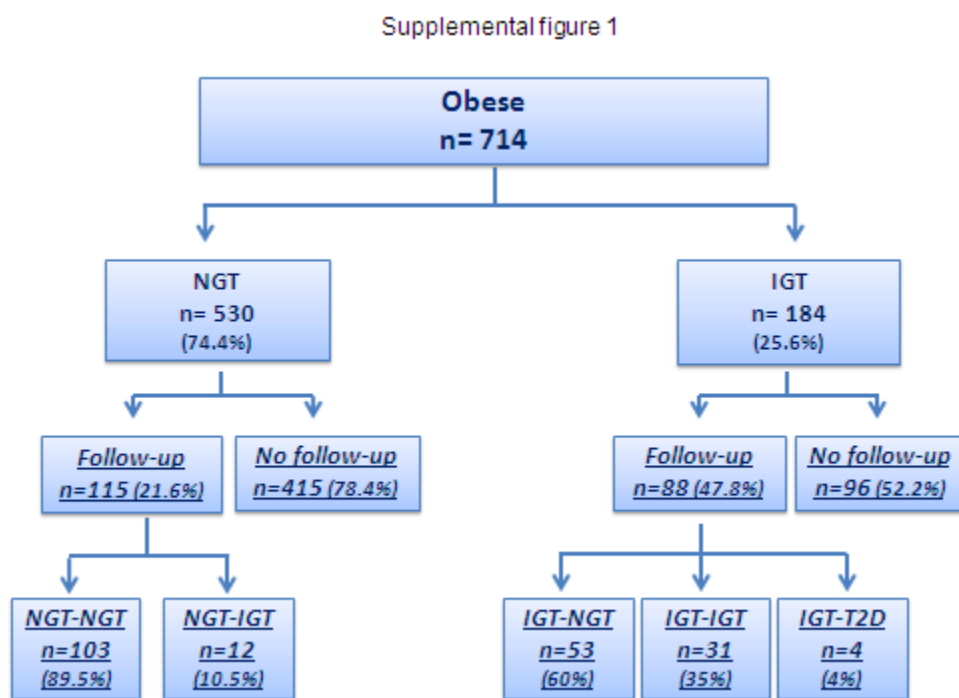

SUPPLEMENTARY DATA

**Supplementary Figure 2.** Association between the allele score and Clamp derived measures of beta cell secretion (first and second phase for c-peptide, respectively)

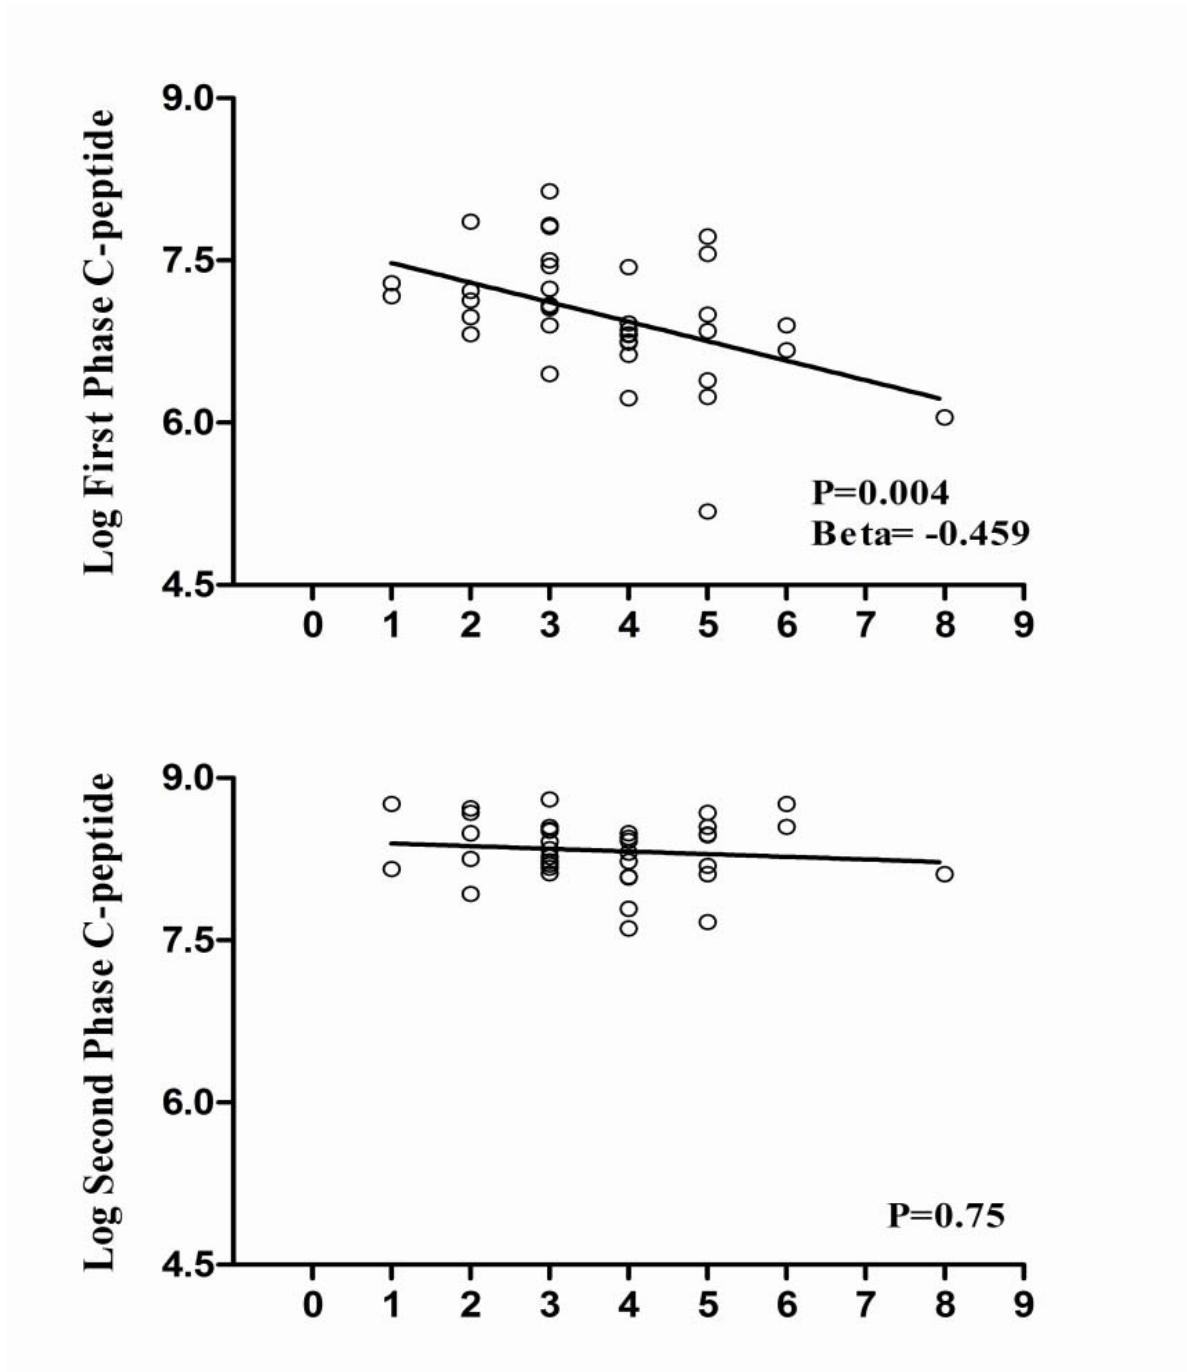

Supplement: dc131458supplementarydata.pdf [file dc131458supplementarydata.pdf]
